# Supplementary material for: HIV-1 CD4-binding site germline antibody–Env structures inform vaccine design
Source: PubMed Central journal article supplement (PMC9576718; doi:10.1038/s41467-022-33860-2), 2022-10-17
Supplement: 41467_2022_33860_MOESM1_ESM.pdf [file 41467_2022_33860_MOESM1_ESM.pdf]

## Supplementary Information

### HIV-1 CD4-binding site germline antibody–Env structures inform vaccine design

Kim-Marie A. Dam<sup>1</sup>, Christopher O. Barnes<sup>1‡</sup>, Harry B. Gristick<sup>1</sup>, Till Schoofs<sup>2,3,4§</sup>, Priyanthi N.P. Gnanapragasam<sup>1</sup>, Michel C. Nussenzweig<sup>2,5</sup>, Pamela J. Bjorkman<sup>1</sup>

<sup>1</sup>Division of Biology and Biological Engineering, California Institute of Technology, Pasadena, CA, USA

<sup>2</sup>Laboratory of Molecular Immunology, The Rockefeller University, New York, NY, USA

<sup>3</sup>Laboratory of Experimental Immunology, Institute of Virology, University of Cologne, Faculty of Medicine and University Hospital of Cologne, Cologne, Germany

<sup>4</sup>German Center for Infection Research, Partner Site Bonn–Cologne, Cologne, Germany

<sup>5</sup>Howard Hughes Medical Institute, Chevy Chase, MD, USA

‡Present address: Department of Biology, Stanford University, Stanford, CA, USA

§Present address: GlaxoSmithKline Vaccines, 1330 Rixensart, Belgium

Corresponding author: Pamela Bjorkman

Email: [bjorkman@caltech.edu](mailto:bjorkman@caltech.edu)

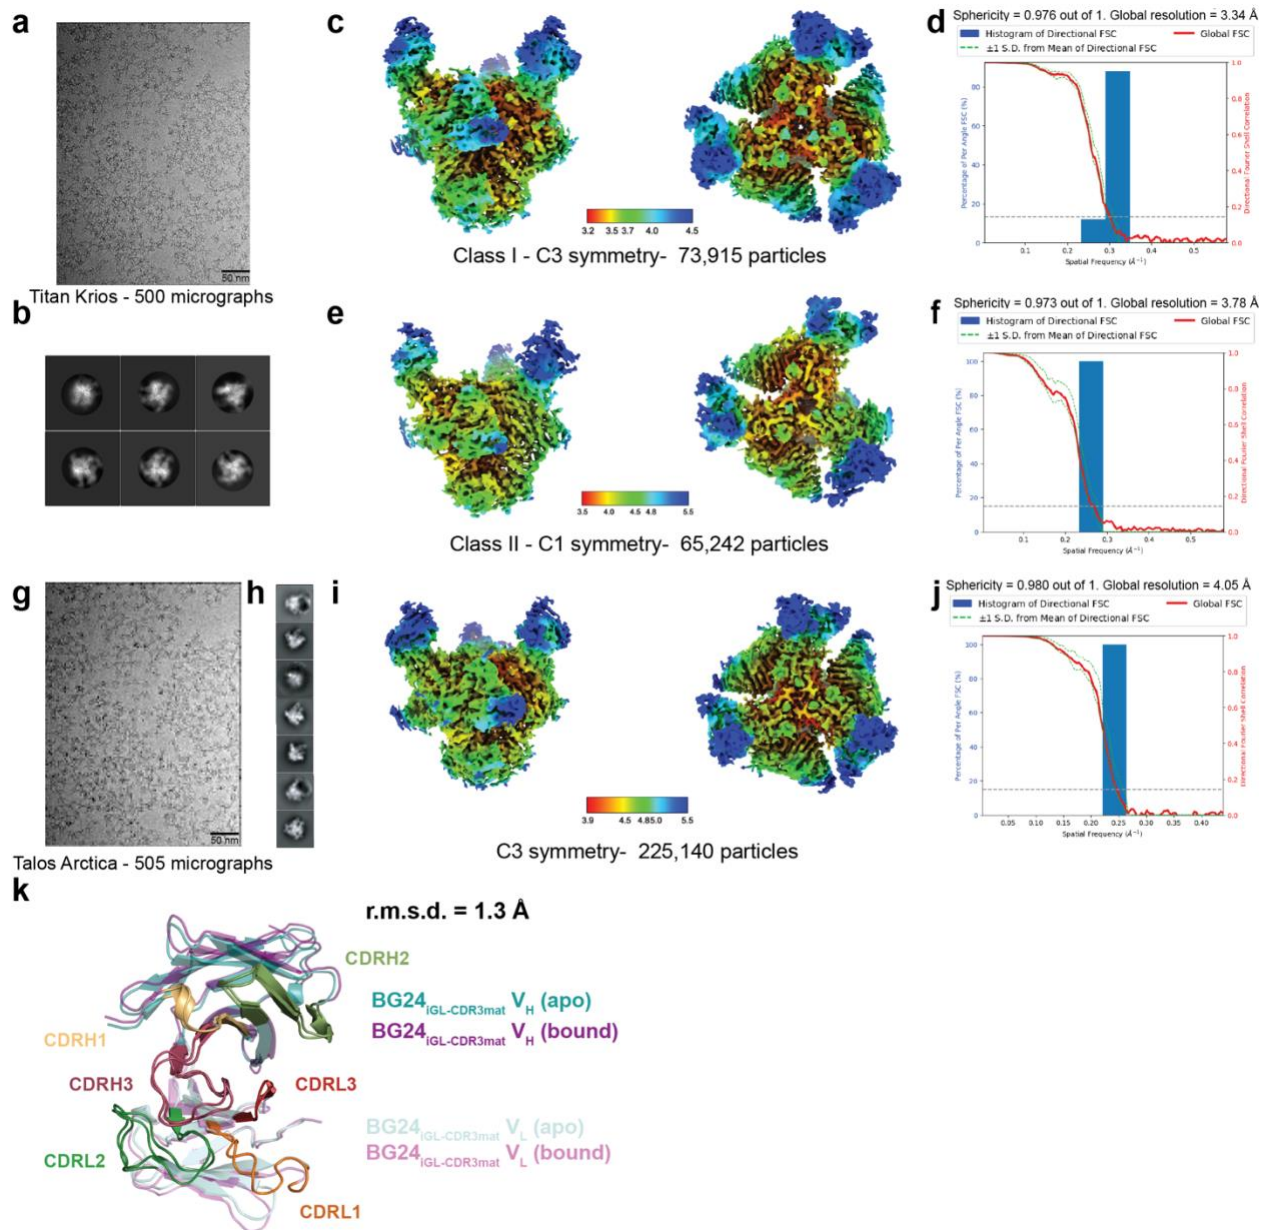

**Supplementary Fig. 1 | Cryo-EM data processing and validation for BG24<sub>iGL</sub>- GT1-10-1074 complexes and BG24<sub>iGL-CDR3mat</sub> Fab alignment**

**a**, Representative micrograph and **b**, cryo-EM 2D class averages for the BG24<sub>iGL-CDR3iGL</sub>- GT1-10-1074 cryo-EM structures. For this dataset, two classes were resolved: Class I with three BG24<sub>iGL-CDR3iGL</sub> Fabs bound to GT1, and Class II with two BG24<sub>iGL-CDR3iGL</sub> Fabs bound to GT1. Differences in the cryo-EM density map for Class I and Class II of the BG24<sub>iGL-CDR3iGL</sub>-GT1-10-1074 complex were not observed. The **c**, local resolution map and **d**, gold-standard Fourier

shell correlation (FSC) plots for BG24<sub>iGL-CDR3iGL</sub>-GT1-10-1074 Class I. The **e**, local resolution map and **f**, gold-standard Fourier shell correlation (FSC) plots for BG24<sub>iGL-CDR3iGL</sub>-GT1-10-1074 Class II. **g**, Representative micrograph, **h**, cryo-EM 2D class averages, **i**, local resolution estimations, and **j**, gold-standard Fourier shell correlation (FSC) plots for BG24<sub>iGL-CDR3mat</sub>-GT1-10-1074. **k**, Alignment and r.m.s.d. (Å) of the crystal structure of apo BG24<sub>iGL-CDR3mat</sub> Fab and the BG24<sub>iGL-CDR3mat</sub> Fab bound to GT1 in the cryo-EM structure.

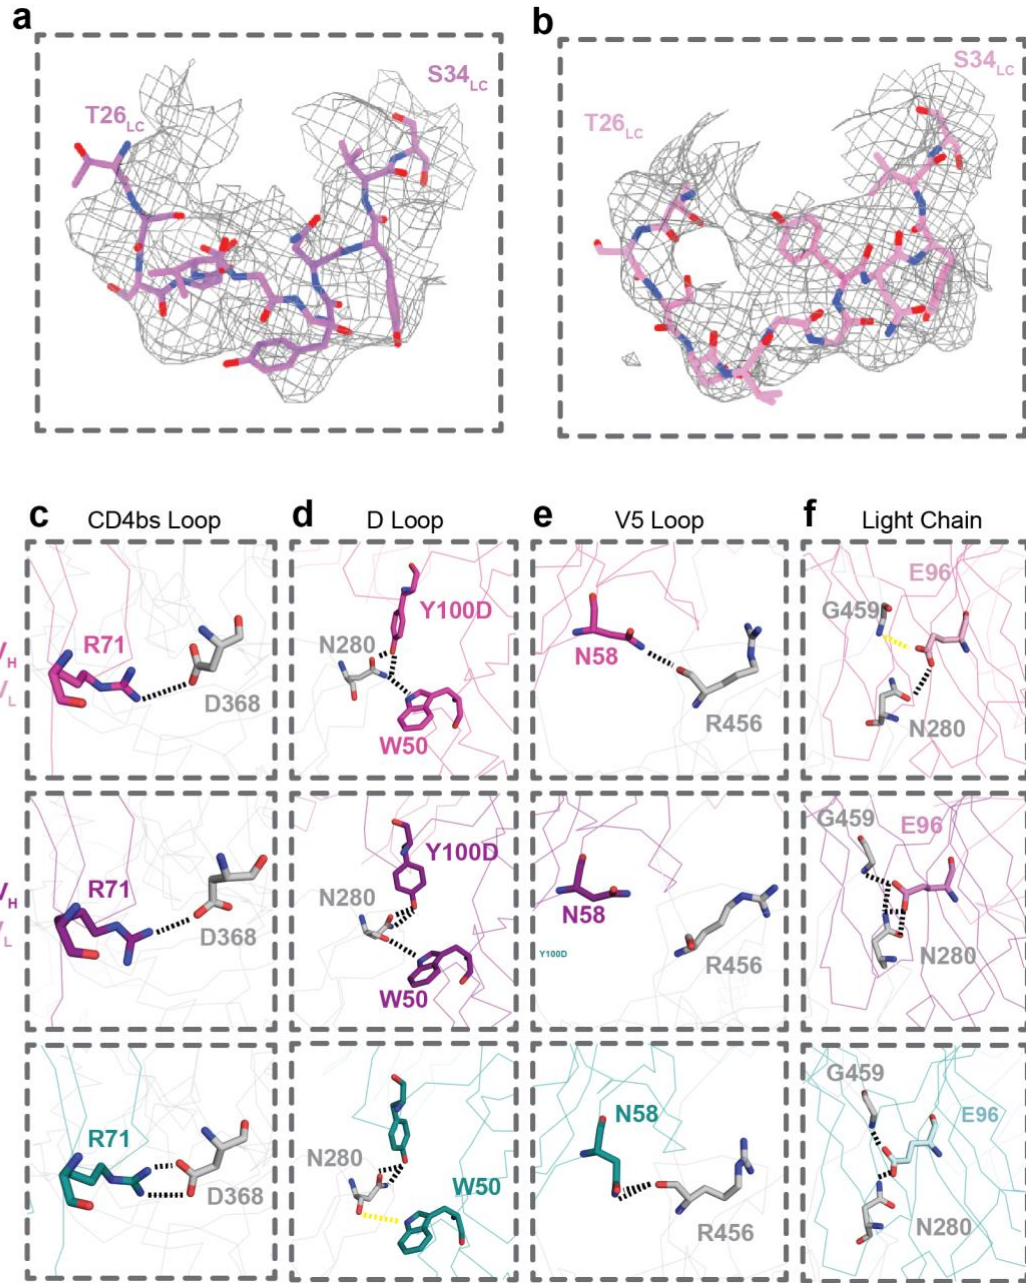

**Supplementary Fig. 2 | BG24<sub>iGL</sub> CDR1 local density and VH1-2\*02 signature contacts comparison among BG24<sub>iGL</sub> and BG24<sub>mat</sub> structures**

Local density for CDRL1 with modeled LC residues T26-S34<sub>LC</sub> (stick representation) for **a**, BG24<sub>iGL-CDR3mat</sub> and **b**, BG24<sub>iGL-CDR3iGL</sub> contoured to 3.8 and 3.6  $\sigma$ , respectively. Interactions in **c**, CD4bs, **d**, D Loop, **e**, V5 loop, and **f**, LC for BG24<sub>iGL-CDR3iGL</sub>-GT1<sub>gp120</sub>, BG24<sub>iGL-CDR3mat</sub>-GT1<sub>gp120</sub>,

and BG24<sub>mat</sub>-BG505<sub>gp120</sub> structures. Contacts between atoms within 4 Å are represented by black dotted lines; contacts between 4-5 Å are represented by yellow dotted lines.

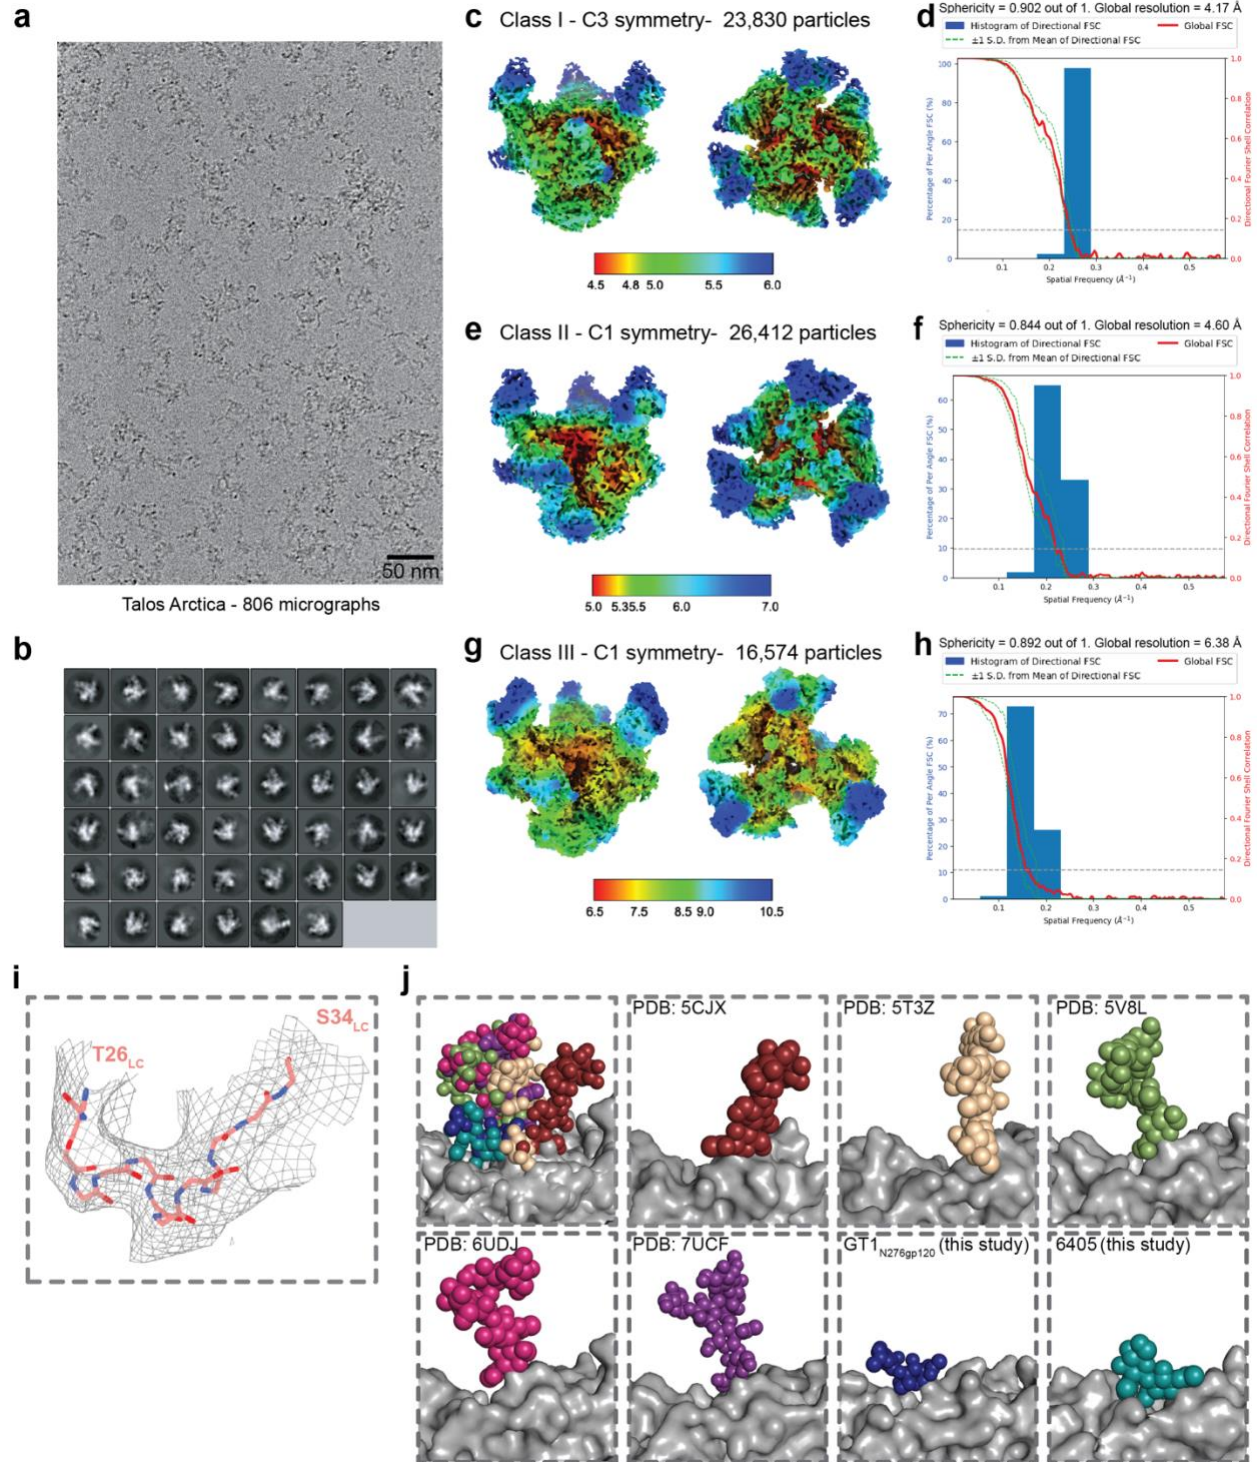

Supplementary Fig. 3 | Cryo-EM data processing and validation for BG24<sub>LC-iGL</sub>-

GT1<sub>N276gp120</sub>-10-1074 complex, BG24<sub>LC-iGL</sub> CDRL1 local density, and analysis of N276<sub>gp120</sub>

glycan flexibility

**a**, Representative micrograph, **b**, cryo-EM 2D class averages for the BG24<sub>LC-iGL</sub>-GT1<sub>N276gp120</sub>-10-1074 cryo-EM structures. For this dataset, three classes were resolved: Class I with three BG24<sub>LC-iGL</sub> Fabs bound to GT1<sub>N276gp120</sub>, Class II with two BG24<sub>LC-iGL</sub> Fabs bound to GT1<sub>N276gp120</sub>, and Class III with one BG24<sub>LC-iGL</sub> Fab bound to GT1<sub>N276gp120</sub>. The **c**, local resolution map and **d**, gold-standard Fourier shell correlation (FSC) plots for BG24<sub>LC-iGL</sub>-GT1<sub>N276gp120</sub>-10-1074 Class I. The **e**, local resolution map and **f**, gold-standard Fourier shell correlation (FSC) plots for BG24<sub>LC-iGL</sub>-GT1<sub>N276gp120</sub>-10-1074 Class II. The **g**, local resolution map and **h**, gold-standard Fourier shell correlation (FSC) plots for BG24<sub>LC-iGL</sub>-GT1<sub>N276gp120</sub>-10-1074 Class III. **i**, Local density for CDRL1 with modeled backbone for LC residues T26-S34<sub>LC</sub> (stick representation) for BG24<sub>LC-iGL</sub> contoured to 5.4  $\sigma$ . **j**, Comparison and overlay of the N276<sub>gp120</sub> glycan from existing Env structures and GT1<sub>N276gp120</sub> and 6405 from this study.

```

Consensus XNLWTVYYGVPVWKDAETTLFCASDAKAYETEKHNWVATHACVPTDPNPQEIHLNVTVEEFNMWKNMVEQMHTDIISL
BG505     S.....
GT1       E.....K.....
6405     ND.....E.K.....S...A..I.....VE.V...N.....D..D...E.....

```

```

Consensus WDQSLKPCVKLTPLCVTLQCTNVNITDD-----MRGELKNCSFNMTTEL RDKXQKVHALFYRLDIVPINENQ
BG505     .....K...YS.....V.Q.....
GT1       .....R.....K.....
6405     ..E.....SEMK.GTRGASNSTGTNNGTISSTDRM....A..VVN..QK.....E..GN--

```

```

Consensus -----XNTEYRLINCNTSAITQACPKVSFEPIPIHYCAPAGFAILKCKDKKFNGTGPCPSVSTVQCTHGIKPVVSTQLL
BG505     GNRSNNS.K.....
GT1       .....S.....A.....
6405     -----NS..M.....A.S...IT.....L..R..Q.....TN..S.....

```

Loop D

```

Consensus LNGSLAEEEEVMIRSENITNNAKNILVQFNTVPQINCTRPNNTRKSIRIGPGQAFYATG--DIIGDIRQAHCVSKATWN
BG505     .....
GT1       .....D.R.....W.....
6405     .....DII.....L.D.T.T.I..L.KSIA.....Y...QR.H.....IWTNDARV.V.....RVD..

```

CD4bs Loop

V4 Loop

β20/β21

```

Consensus ETLGKVVQLRKHFGNNTIIRFANSSGGDLEVTTHSFNCGGEFFYCNTSGLFNSTWISNTSVQGSNSTGSNDSITLPCRI
BG505     .....
GT1       .....D.....
6405     NMTQWAATK.GSLYN-RST.I.NHA...P.I...T.....DIMN----TSPNNTDPI...Q...

```

β20/β21

β23 V5 Loop β24

```

Consensus KQIINMWQRIGQAMYAPPIQGVIXCSNITGLILTRDGG-STXSTTETFRPGGGMDRDNWRSELYKYKVVKIEPLGVAPT
BG505     .....R.V.....N.....
GT1       .....WMCQYHR.....D.....S.....
6405     .....GV.R.I...A.Q.L.S.....L.....ADNS.HN.....N.K.....I...

```

```

Consensus RCKRRVVG
BG505     .....
GT1       .....
6405     KAR....E

```

### Supplementary Fig. 4 | Sequence Alignment of BG505, GT1, and 6405 gp120

The sequence alignment for BG505, GT1, and 6405 gp120 residues and assigned consensus sequence. PNGS sequons in the consensus sequence are boxed in red, with residues numbers corresponding to Asn in the PNGS indicated above the sequence. PNGSs that are not conserved are highlighted in yellow, again with residues numbers corresponding to the Asn in the PNGS indicated above the sequence.



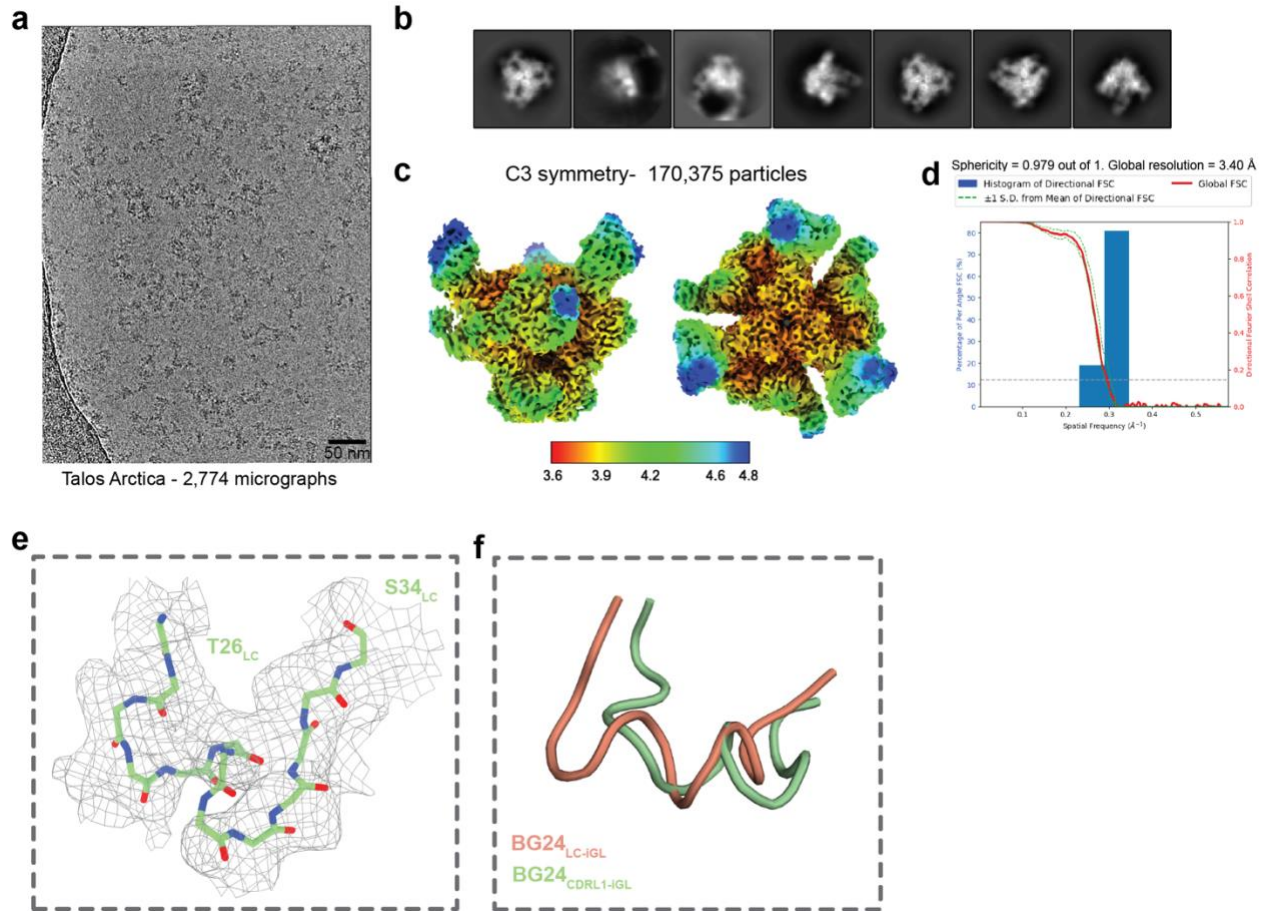

**Supplementary Fig. 5 | Cryo-EM data processing and validation for BG24<sub>CDRL1-iGL</sub>-6405-10-1074 complex and BG24<sub>CDRL1-iGL</sub> CDRL1 local density**

**a**, Representative micrograph, **b**, cryo-EM 2D class averages, **c**, local resolution estimations, and **d**, gold-standard Fourier shell correlation (FSC) plots for BG24<sub>CDRL1-iGL</sub>-6405-10-1074. **e**, Local density for CDRL1 with modeled backbone for residues T26-S34<sub>LC</sub> (stick representation) for BG24<sub>CDRL1-iGL</sub> contoured to 4.4  $\sigma$ . **f**, Alignment of BG24<sub>iGL</sub> CDRL1s from the BG24<sub>LC-iGL</sub>-GT1<sub>N276gp120</sub>-10-1074 structure and from the BG24<sub>CDRL1-iGL</sub>-6405-BG24<sub>LC-iGL</sub>-10-1074 structure. CDRL1s are represented in cartoon.

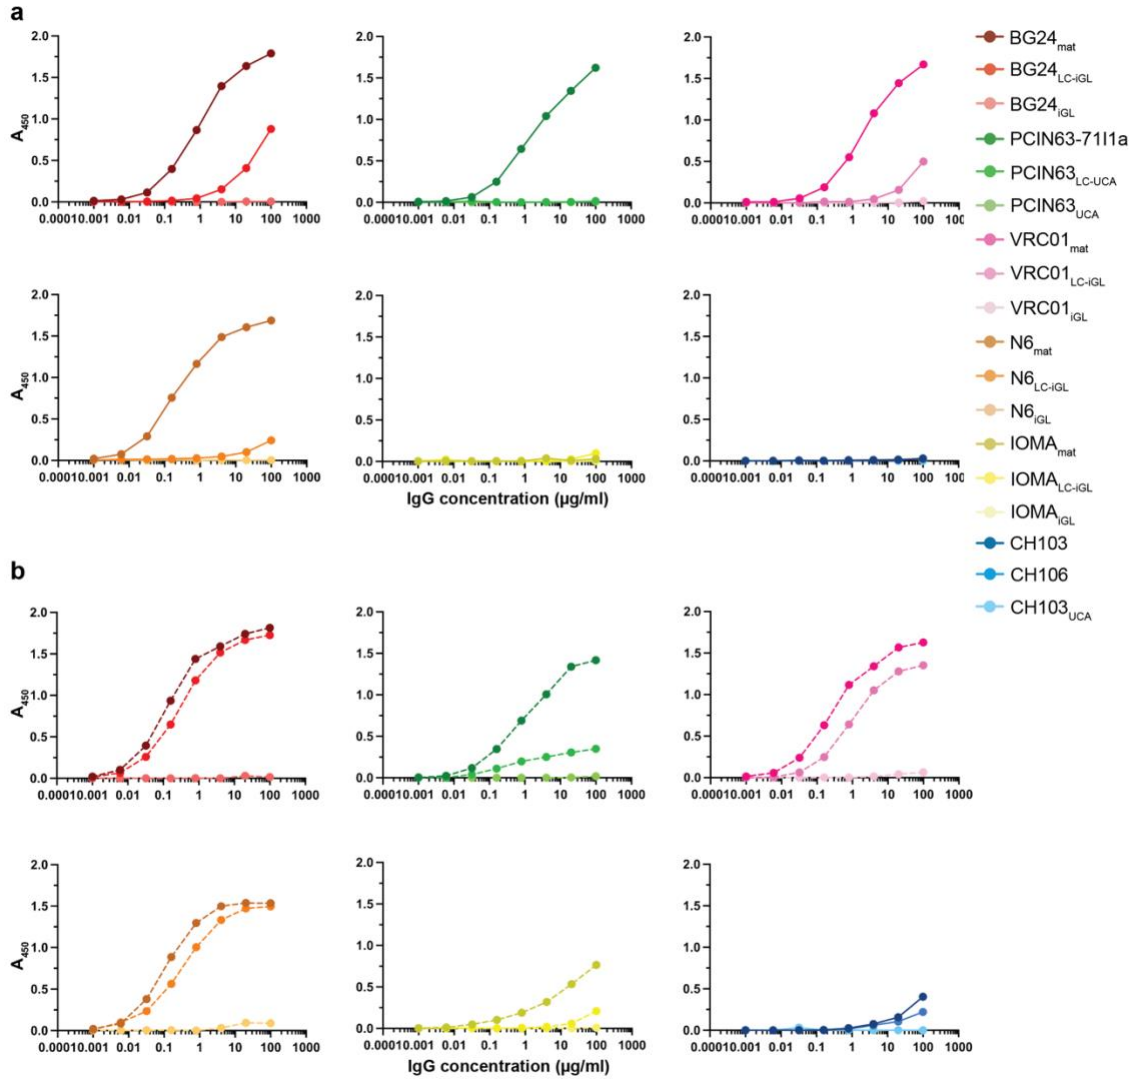

**Supplementary Fig. 6 | ELISA curves of CD4bs IgGs bound to 6405 and 6405<sub>delN276gp120</sub>**

ELISA curves corresponding to CD4bs IgGs bound to **a**, 6405 and **b**, 6405<sub>delN276gp120</sub> SOSIPs.

Values are shown as mean  $\pm$  s.d. of two individual biological replicates (n=2).

**Supplementary table 1. Cryo-EM data collection, refinement, and validation statistics**

|                                                     | BG24 <sub>iGL-CDR3iGL</sub> -GT1-10-1074 | BG24 <sub>iGL-CDR3mat</sub> -GT1-10-1074 | BG24 <sub>LC-iGL</sub> -GT1 <sub>N276gp120</sub> -10-1074 | BG24 <sub>CDRL1-iGL</sub> -6405-10-1074 |
|-----------------------------------------------------|------------------------------------------|------------------------------------------|-----------------------------------------------------------|-----------------------------------------|
| EMDB:                                               | EMD-26490                                | EMD-26492                                | EMD-26493                                                 | EMD-26496                               |
| PDB:                                                | 7UGN                                     | 7UGO                                     | 7UGP                                                      | 7UGQ                                    |
| <b>Data collection and processing</b>               |                                          |                                          |                                                           |                                         |
| Magnification*                                      | 105,000x                                 | 73,000x                                  | 45,000x                                                   | 45,000x                                 |
| Voltage (kV)                                        | 300                                      | 200                                      | 200                                                       | 200                                     |
| Electron exposure (e <sup>-</sup> /Å <sup>2</sup> ) | 60                                       | 60                                       | 60                                                        | 60                                      |
| Defocus range (μm)                                  | 1.2-3.0                                  | 1.2-3.0                                  | 1.2-3.0                                                   | 1.2-3.0                                 |
| Pixel size (Å)                                      | 0.8654                                   | 1.436                                    | 0.869                                                     | 0.869                                   |
| Recording mode                                      | Counting                                 | Counting                                 | Counting                                                  | Counting                                |
| Symmetry imposed                                    | C3                                       | C3                                       | C3                                                        | C3                                      |
| Initial particle images (no.)                       | 139,157                                  | 422,161                                  | 178,814                                                   | 770,375                                 |
| Final particle images (no.)                         | 73,915                                   | 225,140                                  | 23,830                                                    | 170,897                                 |
| Overall map resolution (Å)<br>(masked/unmasked)**   | 3.4 (3.7)                                | 4.1 (5.0)                                | 4.2 (4.8)                                                 | 3.4 (3.7)                               |
| <b>Refinement</b>                                   |                                          |                                          |                                                           |                                         |
| Initial model used (PDB code)                       | 5T3Z                                     | 5T3Z                                     | 5T3Z                                                      | 5T3Z                                    |
| Map and model CC                                    | 0.84                                     | 0.82                                     | 0.73                                                      | 0.79                                    |
| Map sharpening <i>B</i> factor (Å <sup>2</sup> )    | -77                                      | -150                                     | -138                                                      | -119                                    |
| Model composition                                   |                                          |                                          |                                                           |                                         |
| Protein residues                                    | 3150                                     | 3138                                     | 3111                                                      | 3162                                    |
| Glycan residues                                     | 67                                       | 87                                       | 66                                                        | 135                                     |
| Validation                                          |                                          |                                          |                                                           |                                         |
| MolProbity score                                    | 1.64                                     | 1.72                                     | 1.97                                                      | 2.08                                    |
| Clashscore                                          | 5.95                                     | 5.97                                     | 11.63                                                     | 13.18                                   |
| Poor rotamers (%)                                   | 0.04                                     | 0                                        | 0.11                                                      | 0.26                                    |
| Ramachandran plot                                   |                                          |                                          |                                                           |                                         |
| Favored (%)                                         | 95.5                                     | 94.2                                     | 94.3                                                      | 92.9                                    |
| Allowed (%)                                         | 4.5                                      | 5.8                                      | 5.7                                                       | 7.1                                     |
| Disallowed (%)                                      | 0                                        | 0                                        | 0                                                         | 0                                       |
| RMS deviations                                      |                                          |                                          |                                                           |                                         |
| Length (Å)                                          | 0.002                                    | 0.002                                    | 0.002                                                     | 0.004                                   |
| Angles (°)                                          | 0.508                                    | 0.491                                    | 0.539                                                     | 0.606                                   |

\* Nominal magnification; \*\* FSC threshold 0.143

Supplementary table 2. X-ray data collection and refinement statistics (molecular replacement)

| PDB ID                                   | iGL BG24 Fab<br>(12-2, SSRL)<br>7UGM          |
|------------------------------------------|-----------------------------------------------|
| <b>Data collection<sup>a</sup></b>       |                                               |
| Space group                              | P2 <sub>1</sub> 2 <sub>1</sub> 2 <sub>1</sub> |
| Unit cell (Å)                            | 53.2, 70.8, 134.9                             |
| α, β, γ (°)                              | 90, 90, 90                                    |
| Wavelength (Å)                           | 1.0                                           |
| Resolution (Å)                           | 38-1.4 (1.42-1.4)                             |
| Unique Reflections                       | 101,139 (49,320)                              |
| Completeness (%)                         | 100 (99.9)                                    |
| Redundancy                               | 19.7 (19.2)                                   |
| CC <sub>1/2</sub> (%)                    | 99.3 (67.2)                                   |
| <I/σI>                                   | 11.0 (1.2)                                    |
| Mosaicity (°)                            | 0.17                                          |
| R <sub>merge</sub> (%)                   | 16 (103)                                      |
| R <sub>pim</sub> (%)                     | 3.7 (237)                                     |
| Wilson B-factor                          | 14.2                                          |
| <b>Refinement and Validation</b>         |                                               |
| Resolution (Å)                           | 38-1.4                                        |
| Number of atoms                          |                                               |
| Protein                                  | 3,189                                         |
| Water                                    | 447                                           |
| R <sub>work</sub> /R <sub>free</sub> (%) | 19.3/20.8                                     |
| R.m.s. deviations                        |                                               |
| Bond lengths (Å)                         | 0.006                                         |
| Bond angles (°)                          | 0.93                                          |
| MolProbity score                         | 1.42                                          |
| Clashscore (all atom)                    | 4.6                                           |
| Poor rotamers (%)                        | 0.3                                           |
| Ramachandran plot                        |                                               |
| Favored (%)                              | 96.9                                          |
| Allowed (%)                              | 3.1                                           |
| Disallowed (%)                           | 0.2                                           |
| Average B-factor (Å)                     |                                               |
| Protein                                  | 24.3                                          |
| Water                                    | 32.7                                          |
